# Supplementary material
Source: PubMed Central journal article supplement (PMC7331461)
Supplement: NIHMS1602098-supplement-Approval_from_Publisher.pdf [file NIHMS1602098-supplement-Approval_from_Publisher.pdf]

## Baker, Sheryl

---

**From:** Jon Speilburg <Jon.Speilburg@sagepub.com>  
**Sent:** Monday, June 8, 2020 2:34 PM  
**To:** Baker, Sheryl  
**Subject:** RE: Pub Med #26324355

### CAUTION: External Email

Dear Ms. Baker,

I hope you're well.

I have just been passed along your query regarding Dr. Wesolowski's article from 2015.

*Mangini NS, Wesolowski R, Ramaswamy B, Lustberg MB, Berger MJ. [Palbociclib: A Novel Cyclin-Dependent Kinase Inhibitor for Hormone Receptor-Positive Advanced Breast Cancer](#). *Ann Pharmacother*. 2015 Nov;49(11):1252-60. doi: 10.1177/1060028015602273. Epub 2015 Aug 31. Review. PubMed PMID: 26324355.*

As the accepted version of the manuscript has been archived, please consider this email permission from SAGE for Dr. Wesolowski to deposit the final, typeset, published version of the manuscript to PMC.

Please let me know if you have any questions.

Best,  
Jon

Jon Speilburg  
Acquisitions Editor II, STM Journals  
SAGE Publishing  
2455 Teller Road  
Thousand Oaks, CA 91320  
USA

Mobile: 805-490-9157  
[www.sagepublishing.com](http://www.sagepublishing.com)

*If at any time you would like to unsubscribe from future communications or update your profile and preferences, you can do so by emailing me.*

*SAGE Publications, Inc. values our relationship with you and recognizes the importance of protecting the privacy of your personal information and strives to comply with all applicable laws related to our communications with you, including without limitation, CASL. Please click [here](#) to view our privacy policy.*
